# Supplementary material for: Study on Characteristics of Chemokine CXCL10 Gene Cloned from cDNA Expression Library of Ujumqin Sheep
Source: Hindawi journal article supplement (doi:10.1155/2013/217942), 2013-01-01
Supplement: f1 [file 217942.f1.pdf]

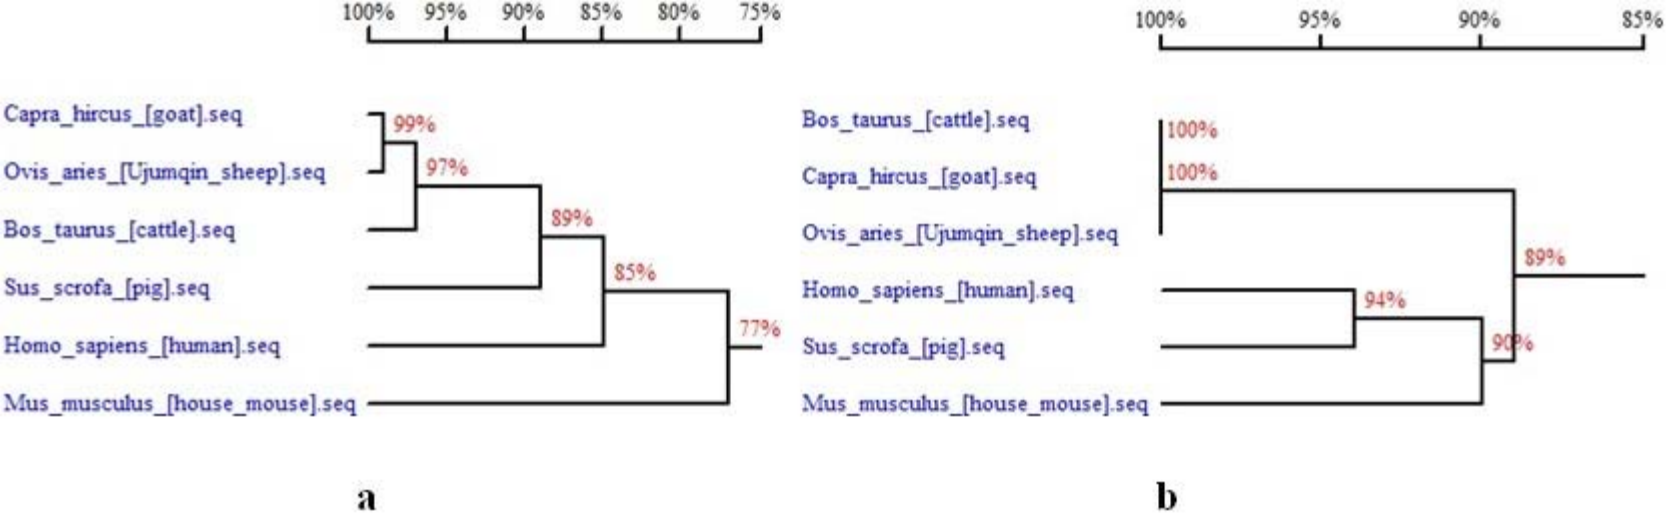

**Fig. S1** Homology Tree of chemokine CXCL10 among different species. **a** The homology tree of CXCL10 gene among different species, **b** The homology tree of CXCL10 protein among different species

|     |     |     |     |     |     |     |     |            |     |            |     |            |     |     |            |     |     |     |     |     |
|-----|-----|-----|-----|-----|-----|-----|-----|------------|-----|------------|-----|------------|-----|-----|------------|-----|-----|-----|-----|-----|
| 1   | ATG | AAC | AAA | AGT | GGT | TTT | CTT | ATT        | TTC | TGC        | CTT | ATC        | CTT | CTG | ACT        | CTG | AGT | CAA | GGC | ATA |
| 1   | MET | Asn | Lys | Ser | Gly | Phe | Leu | Ile        | Phe | Cys        | Leu | Ile        | Leu | Leu | Thr        | Leu | Ser | Gln | Gly | Ile |
| 61  | CCT | CTC | TCT | AGG | AAC | ACA | CGC | TGC        | ACC | TGC        | ATC | GAG        | ATC | AGT | AAT        | GGA | TCT | GTT | AAT | CCA |
| 21  | Pro | Leu | Ser | Arg | Asn | Thr | Arg | <b>Cys</b> | Thr | <b>Cys</b> | Ile | Glu        | Ile | Ser | Asn        | Gly | Ser | Val | Asn | Pro |
| 121 | AGG | TCC | TTA | GAA | AAA | CTT | GAA | CTG        | ATT | CCT        | GCA | AGT        | CAA | TCC | TGC        | CCA | CGT | GTC | GAG | ATT |
| 41  | Arg | Ser | Leu | Glu | Lys | Leu | Glu | Leu        | Ile | Pro        | Ala | Ser        | Gln | Ser | <b>Cys</b> | Pro | Arg | Val | Glu | Ile |
| 181 | ATT | GCC | ACA | ATG | AAA | AGG | AAT | GGG        | GAG | AAA        | AGA | TGT        | CTG | AAT | CCA        | GAA | TCT | AAG | ACC | ATC |
| 61  | Ile | Ala | Thr | MET | Lys | Arg | Asn | Gly        | Glu | Lys        | Arg | <b>Cys</b> | Leu | Asn | Pro        | Glu | Ser | Lys | Thr | Ile |
| 241 | AAG | AAT | TTA | CTG | AAA | GCA | ATT | AAC        | AAG | CAA        | AGG | ACT        | AAA | AGA | TCT        | CCT | CGA | ACA | CAG | AAA |
| 81  | Lys | Asn | Leu | Leu | Lys | Ala | Ile | Asn        | Lys | Gln        | Arg | Thr        | Lys | Arg | Ser        | Pro | Arg | Thr | Gln | Lys |
| 301 | GAG | GCA | TAA |     |     |     |     |            |     |            |     |            |     |     |            |     |     |     |     |     |
| 101 | Glu | Ala | *** |     |     |     |     |            |     |            |     |            |     |     |            |     |     |     |     |     |

**Fig. S2** Nucleotide and deduced amino acid sequences of cDNA encoding CXCL10 gene from Ujumqin sheep. The Cys which was showed in yellow represented 4 conservative cysteine residues in CXCL10 protein, the asterisk (\*\*\*) represents stop codon

Amino Acid Composition  
Ovis aries (Ujumqin sheep)

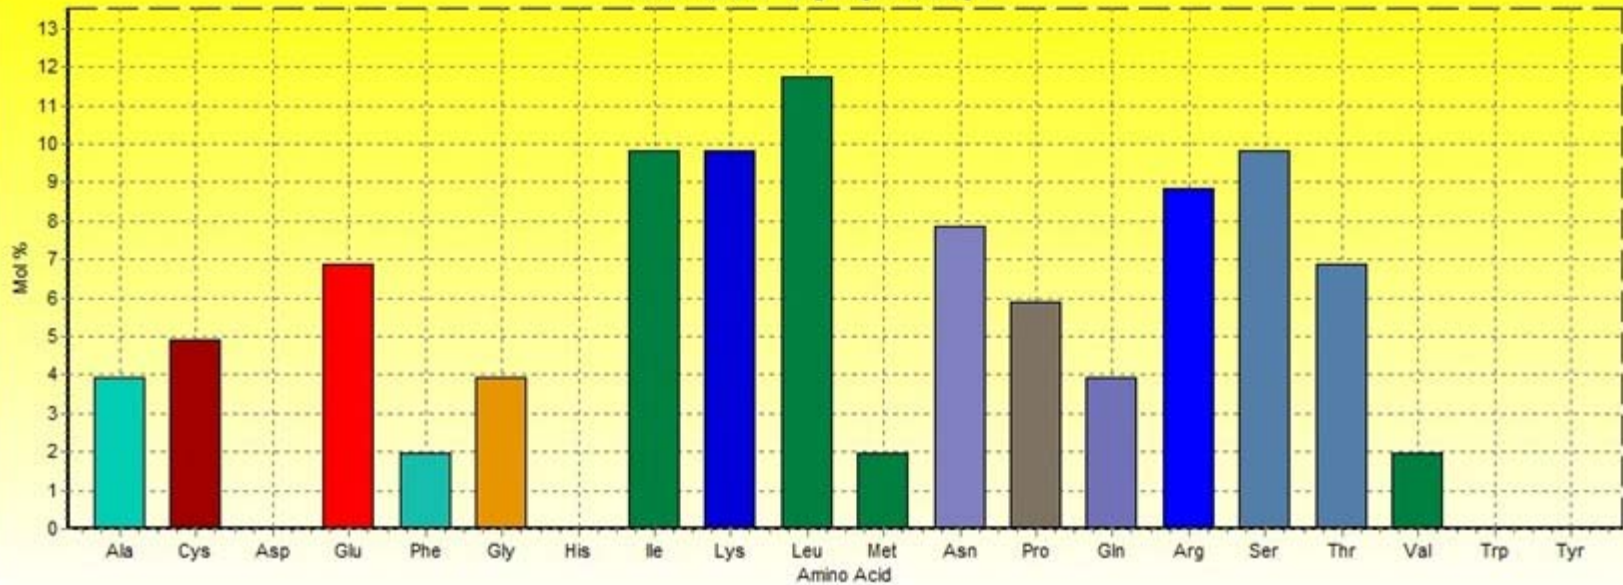

**Fig. S3** Amino acid composition of CXCL10 gene from Ujumqin sheep

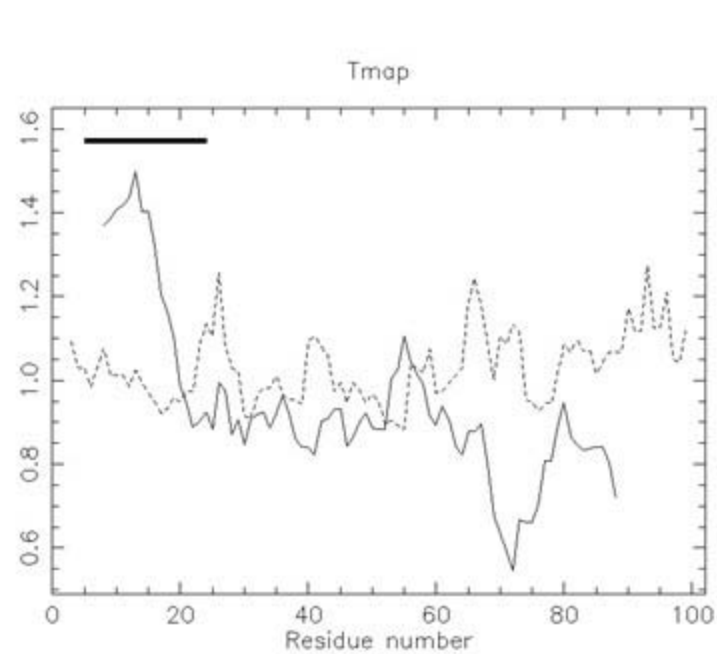

a

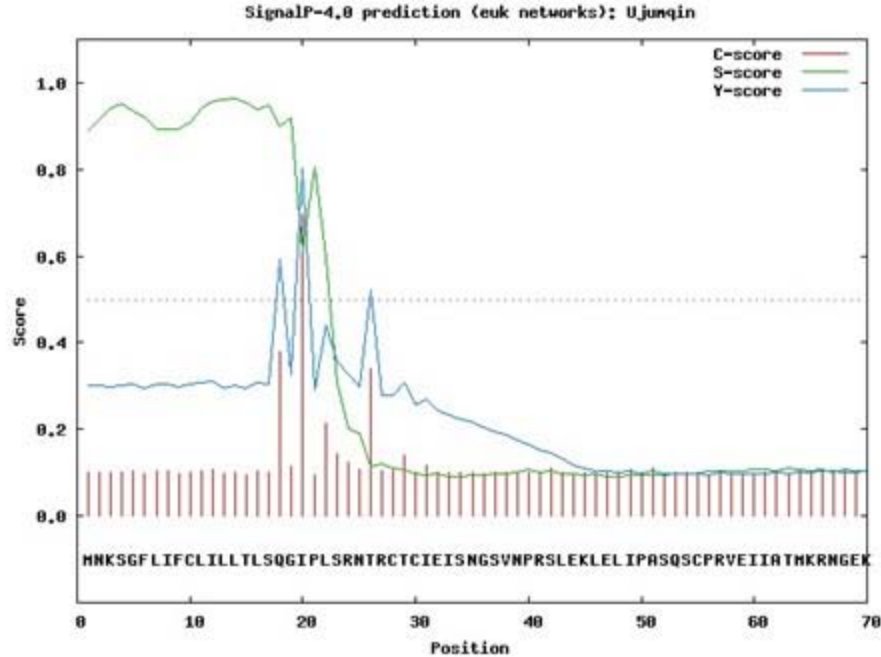

b

**Fig. S4** Prediction of transmembrane domain and signal peptide of CXCL10 protein of Ujumqin sheep. **a** the abscissa represents the number of residues, the ordinate represents hydrophobicity, high hydrophobicity occurred in the first 28 residues, indicating a probable transmembrane domain. **b** cleavage site of CXCL10 protein was between pos. 19 and 20, mean S-score in pos. 1-19 was 0.928

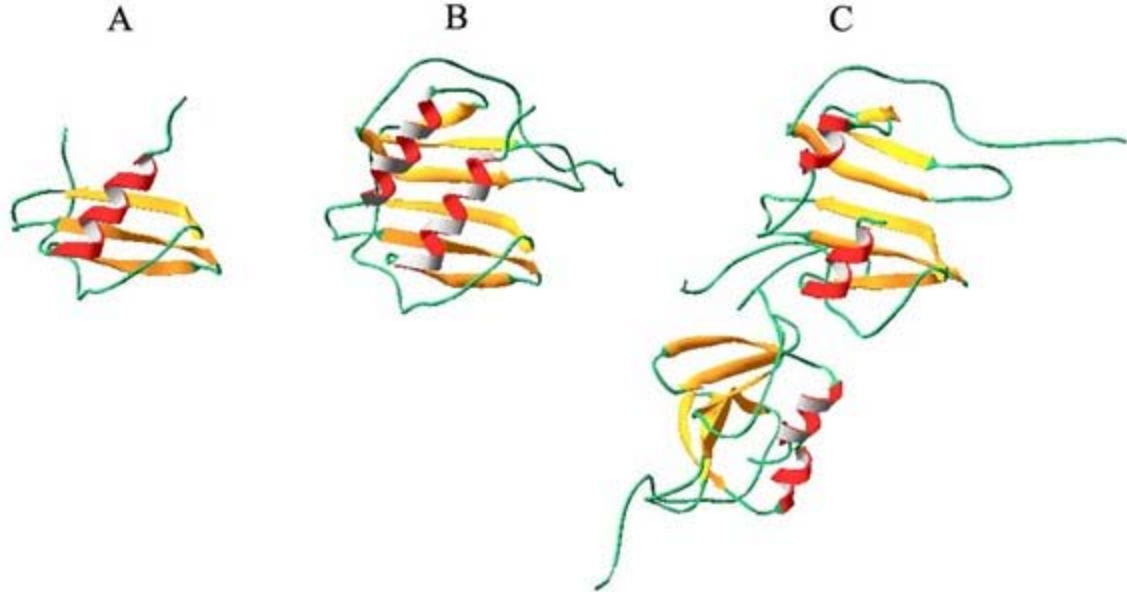

**Fig. S5** CXCL10 protein spatial structure Magic Fit. **a** Ujumqin sheep, **b** Homo sapiens 1O80, **c** Mus musculus 2R3Z

MNKSGFLIFCLILLTLSQ **GIPLSR**NTRCTCIEISNGSVNPRSLEKLELIPASQSCPRVEIIA **TMK**RNGE  
KRCLNPESK **TIK** **LLKA** **INKQR** **TKR** **SPR** **TQKEA**

**Fig. S6** Intra-domain features of CXCL10 amino acid sequences of Ujumqin sheep. \_\_\_\_\_: N-glycosylation site, **■**: N-myristoylation site, ~~~~~: Casein kinase II phosphorylation site, **□**: Protein kinase C phosphorylation site, **■**: Small cytokines C-x-C subfamily signature
